# Supplementary material for: Factors impacting on the implementation of clinical management guidelines (CMGs) for high consequence infectious diseases (HCIDs) during outbreaks globally: a systematic review
Source: bioRxiv or medRxiv preprint supplement (doi:10.1101/2024.11.21.24317702), 2024-11-21
Supplement: Supplementary file [file media-3.pdf]

**Appendix 1: Characteristics of included studies (N=28) grouped by HCID type**

| Study                               | Study setting, Income classification (79) | Study design | Participants                                                                                                                                                                                                                                                                                                                                                                                                | HCID     | Key themes Identified                                                                                                                     | Risk of bias |
|-------------------------------------|-------------------------------------------|--------------|-------------------------------------------------------------------------------------------------------------------------------------------------------------------------------------------------------------------------------------------------------------------------------------------------------------------------------------------------------------------------------------------------------------|----------|-------------------------------------------------------------------------------------------------------------------------------------------|--------------|
| Alanezi, F. et al. (2021)(37)       | Saudi Arabia (HIC)                        | Qualitative  | Nurses (28.4%), senior physicians (23.5%), assistant physicians (12.7%), consultants or chief physicians or medical students (10.8%), pharmacists or administrators (8.8%), others (n=102).                                                                                                                                                                                                                 | COVID-19 | -Logistics organisational support                                                                                                         | High         |
| Chuang, E. et al. (2020)(27)        | USA (HIC)                                 | Qualitative  | Palliative care focus group: Social workers, physicians (n=14).<br>Critical care focus group: physician fellows, junior attending physicians, senior attending physicians, and intensive care unit leadership (n=25).<br>Nursing focus group (n=4).<br>Respiratory therapist (n=20).<br>Interviews: one academic hospital medical director, directors of emergency medicine, and one respiratory therapist. | COVID-19 | -Guidelines characteristics, development, and dissemination<br>-Logistics organisational support<br>-Realities of implementing guidelines | High         |
| Driver, J. A. et al. (2020)(45)     | USA (HIC)                                 | Quantitative | Veterans received outpatient monitoring (n=120)                                                                                                                                                                                                                                                                                                                                                             | COVID-19 | -Logistics organisational support                                                                                                         | Moderate     |
| Francisco, M. A. et al. (2020)(40)  | USA (HIC)                                 | Quantitative | Nurses (n=78)                                                                                                                                                                                                                                                                                                                                                                                               | COVID-19 | -Logistics organisational support<br>-Realities of implementing guidelines                                                                | Moderate     |
| Gonzalez, A. M. et al. (2020)(32)   | Spain (HIC)                               | Qualitative  | Clinical cases (n=5)                                                                                                                                                                                                                                                                                                                                                                                        | COVID-19 | -Guidelines characteristics, development, and dissemination<br>-Logistics organisational support<br>-Realities of implementing guidelines | Moderate     |
| Kurotschka, P. K. et al. (2020)(30) | Italy (HIC)                               | Qualitative  | General practitioners (n=149)                                                                                                                                                                                                                                                                                                                                                                               | COVID-19 | -Guidelines characteristics, development, and dissemination                                                                               | High         |
| Alqahtani, J. S. et al. (2020)(43)  | Based in UK ** (HIC)                      | Quantitative | Critical care practitioners (n=502)                                                                                                                                                                                                                                                                                                                                                                         | COVID-19 | -Logistics organisational support                                                                                                         | Moderate     |

|                                       |                                  |              |                                                                                                                                                                           |          |                                                                                                                                           |          |
|---------------------------------------|----------------------------------|--------------|---------------------------------------------------------------------------------------------------------------------------------------------------------------------------|----------|-------------------------------------------------------------------------------------------------------------------------------------------|----------|
| Ismail, M. et al. (2021). (44)        | Qatar (HIC)                      | Quantitative | Primary care physicians (n=294)                                                                                                                                           | COVID-19 | -Guidelines characteristics, development, and dissemination                                                                               | High     |
| Balkrishnan, P et al. (2019). (38)    | India (LMIC)                     | Quantitative | Patients (pre-intervention phase of six months having 84 patients and post-intervention phase of six months having 50 patients) (n= 134).                                 | Dengue   | -Logistics organisational support                                                                                                         | Moderate |
| Handel, A. S. et al. (2016). (41)     | Ecuador (Upper-Middle Income)    | Quantitative | Healthcare providers (n=76) medical doctors (82 %) Nurses (14 %).                                                                                                         | Dengue   | -Logistics organisational support                                                                                                         | High     |
| Kularatne, S. A. et al. (2003). (42)  | Sri-Lanka (LMIC)                 | Quantitative | Consultant physicians(n=35)<br>Consultant paediatricians (n=15).                                                                                                          | Dengue   | -Guidelines characteristics, development, and dissemination<br>-Realities of implementing guidelines                                      | Low      |
| Wharton-Smith, A. et al. (2014) (34)  | Malaysia (Upper-Middle Income)   | Qualitative  | Medical officers. Six FGDs: (n= 54).<br>Interviews (n=14).                                                                                                                | Dengue   | -Guidelines characteristics, development, and dissemination<br>-Logistics organisational support<br>-Realities of implementing guidelines | High     |
| Barniol, J. et al. (2011). (46)       | 18 countries in four WHO regions | Mixed method | Participants (n=1288)<br>Clinicians, nurses, communicable disease control staff, epidemiologists, management from health care facilities.<br>Chart review total (n=3248). | Dengue   | -Logistics organisational support<br>-Realities of implementing guidelines                                                                | High     |
| Raffetin, A. et al. (2018). (49)      | France (HIC)                     | Mixed method | Family physician (n=33)                                                                                                                                                   | EVD      | -Guidelines characteristics, development, and dissemination                                                                               | Moderate |
| Christine Loignon et al. (2018). (36) | West Africa                      | Qualitative  | Stakeholders (decision-makers, physicians, nurses). (n=29).                                                                                                               | EVD      | Logistics organisational support                                                                                                          | High     |
| Battista, M. C. et al. (2019). (39)   | West Africa                      | Quantitative | Physicians (n= 24, (83%)), nurses (n= 3, 10%), and project management and coordination (n=2, 7%). Total sample: n= 29.                                                    | EVD      | -Guidelines characteristics, development, and dissemination<br>-Logistics organisational support                                          | Moderate |
| Broom, J. et al. (2016). (26)         | Australia (HIC)                  | Qualitative  | Consultants (n=8), and nurses (n=13).<br>Total sample: n= 21.                                                                                                             | EVD      | -Guidelines characteristics, development, and dissemination                                                                               | High     |
| Erland, E. et al. (2017). (28)        | West Africa                      | Qualitative  | Midwives (n=11)                                                                                                                                                           | EVD      | -Guidelines characteristics, development, and dissemination.<br>-Realities of implementing guidelines                                     | High     |

|                                      |                      |               |                                                                                                                                            |                              |                                                                                                                                           |          |
|--------------------------------------|----------------------|---------------|--------------------------------------------------------------------------------------------------------------------------------------------|------------------------------|-------------------------------------------------------------------------------------------------------------------------------------------|----------|
| Lam, S. et al. (2014), (31)          | Hong Kong (HIC)      | Qualitative   | Emergency nurses (n=12)                                                                                                                    | Emerging infectious diseases | -Realities of implementing guidelines                                                                                                     | High     |
| Nhan, C. et al. (2012), (48)         | Canada (HIC)         | Mixed method  | 39% (68/ 173) and 41% (61/147) of AMMIQ and AMSSCQ members, respectively, (n =129).                                                        | Influenza (H1N1)             | -Guidelines characteristics, development, and dissemination<br>-Logistics organisational support<br>-Realities of implementing guidelines | Moderate |
| Filice, C. E. et al. (2013), (29)    | USA (HIC)            | Qualitative   | Medical directors (n=15) and designated other EPs in leadership roles in their departments (n=5).                                          | Influenza (H1N1)             | -Guidelines characteristics, development, and dissemination<br>-Logistics organisational support<br>-Realities of implementing guidelines | High     |
| Ahankari, A. S et al (2017), (25)    | India (LMIC)         | Qualitative   | General physicians (GPs), specialists in allopathy (n = 16), Ayurveda (n = 3) homeopathy (n = 1). Total practitioners (n=20).              | Influenza                    | -Guidelines characteristics, development, and dissemination                                                                               | High     |
| Haq, Z et al. (2016), (51)           | Mediterranean Region | Opinion piece | Not applicable                                                                                                                             | Influenza                    | -Guidelines characteristics, development, and dissemination<br>-Logistics organisational support<br>-Realities of implementing guidelines | *        |
| Gesser-Edelsburg et al. (2014), (35) | Israel (HIC)         | Qualitative   | Stakeholders (hospital physicians (n=14), hospital nurse (n=21), community physicians (n= 10), community nurse (n=4). Total sample (n=70). | Influenza                    | -Logistics organisational support<br>-Realities of implementing guidelines                                                                | High     |
| Phipps, E. et al. (2019), (33)       | England (HIC)        | Qualitative   | Outbreaks (n=109).                                                                                                                         | Influenza                    | -Guidelines characteristics, development, and dissemination                                                                               | High     |
| Bandara, T. et al (2020), (50)       | Canada (HIC)         | Opinion piece | Not applicable                                                                                                                             | Influenza                    | -Guidelines characteristics, development, and dissemination<br>-Logistics organisational support<br>-Realities of implementing guidelines | *        |
| Omrani, A. S. et al (2015), (52)     | Saudi Arabia (HIC)   | Opinion piece | Not applicable                                                                                                                             | MERS-CoV                     | -Realities of implementing guidelines                                                                                                     | *        |
