# Supplementary material for: Factors impacting on the implementation of clinical management guidelines (CMGs) for high consequence infectious diseases (HCIDs) during outbreaks globally: a systematic review
Source: bioRxiv or medRxiv preprint supplement (doi:10.1101/2024.11.21.24317702), 2024-11-21
Supplement: Supplementary file [file media-4.pdf]

## Appendix 2-a: Quality appraisal of included studies using the MMAT Qualitative tool

| Study                       | 1.1. Is the qualitative approach appropriate to answer the research question? | 1.2. Are the qualitative data collection methods adequate to address the research question? | 1.3. Are the findings adequately derived from the data? | 1.4. Is the interpretation of results sufficiently substantiated by data? | 1.5. Is there coherence between qualitative data sources collection, analysis and interpretation? |
|-----------------------------|-------------------------------------------------------------------------------|---------------------------------------------------------------------------------------------|---------------------------------------------------------|---------------------------------------------------------------------------|---------------------------------------------------------------------------------------------------|
| Ahankari et al.(25)         | Yes                                                                           | Yes                                                                                         | Yes                                                     | Yes                                                                       | Yes                                                                                               |
| Broom et al.(26)            | Yes                                                                           | Yes                                                                                         | Yes                                                     | Yes                                                                       | Yes                                                                                               |
| Chuang et al.(27)           | Yes                                                                           | Yes                                                                                         | Yes                                                     | Yes                                                                       | Yes                                                                                               |
| Erland et al.(28)           | Yes                                                                           | Yes                                                                                         | Yes                                                     | Yes                                                                       | Yes                                                                                               |
| Filice et al.(29)           | Yes                                                                           | Yes                                                                                         | Yes                                                     | Yes                                                                       | Yes                                                                                               |
| Kurotschka et al.(30)       | Yes                                                                           | Yes                                                                                         | Yes                                                     | Yes                                                                       | Yes                                                                                               |
| Lam et al.(31)              | Yes                                                                           | Yes                                                                                         | Yes                                                     | Yes                                                                       | Yes                                                                                               |
| Gonzalez et al.(32)         | Yes                                                                           | Can't tell                                                                                  | Yes                                                     | Yes                                                                       | Yes                                                                                               |
| Phipps et al.(33)           | Yes                                                                           | Yes                                                                                         | Yes                                                     | Yes                                                                       | Yes                                                                                               |
| Wharton-Smith et al.(34)    | Yes                                                                           | Yes                                                                                         | Yes                                                     | Yes                                                                       | Yes                                                                                               |
| Gesser-Edelsburg et al.(35) | Yes                                                                           | Yes                                                                                         | Yes                                                     | Yes                                                                       | Yes                                                                                               |
| Loignon et al.(36)          | Yes                                                                           | Yes                                                                                         | Yes                                                     | Yes                                                                       | Yes                                                                                               |

## Appendix 2-b: Quality appraisal of included studies using the MMAT quantitative tools

| Study                       | Quantitative studies                                                     |                                                             |                                        |                                           |                                                                               |
|-----------------------------|--------------------------------------------------------------------------|-------------------------------------------------------------|----------------------------------------|-------------------------------------------|-------------------------------------------------------------------------------|
|                             | 2.1. Is the sampling strategy relevant to address the research question? | 2.2. Is the sample representative of the target population? | 2.3. Are the measurements appropriate? | 2.4. Is the risk of nonresponse bias low? | 2.5. Is the statistical analysis appropriate to answer the research question? |
| Alanezi F et al.(37)        | Yes                                                                      | Yes                                                         | Yes                                    | Yes                                       | Yes                                                                           |
| Balkrishnan , P et al.(38)  | Yes                                                                      | Yes                                                         | Yes                                    | Can't tell                                | Yes                                                                           |
| Battista, M. C.et al.(39)   | Yes                                                                      | Yes                                                         | Yes                                    | Can't tell                                | Yes                                                                           |
| Francisco M. A et al.(40)   | Yes                                                                      | Yes                                                         | Yes                                    | No                                        | Yes                                                                           |
| Handel, A. S. et al.(41)    | Yes                                                                      | Yes                                                         | Yes                                    | Yes                                       | Yes                                                                           |
| Kularatne, S. A. et al.(42) | No                                                                       | No                                                          | No                                     | Yes                                       | No                                                                            |

|                             |                                                                           |                                                                                               |                                              |                                                                           |                                                                                                        |
|-----------------------------|---------------------------------------------------------------------------|-----------------------------------------------------------------------------------------------|----------------------------------------------|---------------------------------------------------------------------------|--------------------------------------------------------------------------------------------------------|
| Alqahtani, J. S. et al.(43) | Yes                                                                       | No                                                                                            | Yes                                          | No                                                                        | Yes                                                                                                    |
| Ismail, M. et al.(44)       | Yes                                                                       | Yes                                                                                           | Yes                                          | Yes                                                                       | Yes                                                                                                    |
|                             | <b>Quantitative non-randomized</b>                                        |                                                                                               |                                              |                                                                           |                                                                                                        |
|                             | <b>3.1. Are the participants representative of the target population?</b> | <b>3.2. Are measurements appropriate regarding both the outcome intervention or exposure?</b> | <b>3.3. Are there complete outcome data?</b> | <b>3.4. Are the confounders accounted for in the design and analysis?</b> | <b>3.5. During the study period is the intervention administered or exposure occurred as intended?</b> |
| Driver, J. A. et al.(45)    | Yes                                                                       | Yes                                                                                           | Can't tell                                   | Can't tell                                                                | Yes                                                                                                    |

#### Appendix 2-c: Quality appraisal of included studies using the MMAT mixed method tool

| Study                   | 4.1. Is there an adequate rationale for using a mixed methods design to address the research question? | 4.2. Are the different components of the study effectively integrated to answer the research question? | 4.3. Are the outputs of the integration of qualitative and quantitative components adequately interpreted? | 4.4. Are divergences and inconsistencies between quantitative and qualitative results adequately addressed? | 4.5. Do the different components of the study adhere to the quality criteria of each tradition of the methods involved? |
|-------------------------|--------------------------------------------------------------------------------------------------------|--------------------------------------------------------------------------------------------------------|------------------------------------------------------------------------------------------------------------|-------------------------------------------------------------------------------------------------------------|-------------------------------------------------------------------------------------------------------------------------|
| Barniol, J. et al.(46)  | Yes                                                                                                    | Yes                                                                                                    | Yes                                                                                                        | Yes                                                                                                         | Yes                                                                                                                     |
| Fryk, J. J. et al.(47)  | Yes                                                                                                    | Yes                                                                                                    | Yes                                                                                                        | Yes                                                                                                         | Yes                                                                                                                     |
| Nhan, C. et al.(48)     | Yes                                                                                                    | Yes                                                                                                    | Yes                                                                                                        | No                                                                                                          | No                                                                                                                      |
| Raffetin, A. et al.(49) | Yes                                                                                                    | Yes                                                                                                    | Yes                                                                                                        | No                                                                                                          | Yes                                                                                                                     |

#### Appendix 2-d: Quality appraisal of included studies using the JBI critical appraisal checklist for text and opinion papers

| Study                    | Is the source of the opinion clearly identified? | Does the source of opinion have standing in the field of expertise? | Are the interests of the relevant population the central focus of the opinion? | Is the stated position the result of an analytical process and is there logic in the opinion expressed? | Is there reference to the extant literature? | Is any incongruence with the literature sources logically defended? |
|--------------------------|--------------------------------------------------|---------------------------------------------------------------------|--------------------------------------------------------------------------------|---------------------------------------------------------------------------------------------------------|----------------------------------------------|---------------------------------------------------------------------|
| Bandara, T. et al.(50)   | Yes                                              | Yes                                                                 | Yes                                                                            | Yes                                                                                                     | Yes                                          | Yes                                                                 |
| Haq, Z. et al.(51)       | Yes                                              | Yes                                                                 | Yes                                                                            | Yes                                                                                                     | Yes                                          | Yes                                                                 |
| Omrani, A. S. et al.(52) | Yes                                              | Yes                                                                 | Yes                                                                            | Yes                                                                                                     | Yes                                          | Yes                                                                 |
